# Supplementary material
Source: PubMed Central journal article supplement (PMC9165559)
Supplement: NEJMc2203165_appendix.pdf [file NEJMc2203165_appendix.pdf]

## Supplementary Appendix

Supplement to: Accorsi EK, Britton A, Shang N, et al. Effectiveness of homologous and heterologous Covid-19 boosters against omicron. *N Engl J Med*. DOI: 10.1056/NEJMc2203165

This appendix has been provided by the authors to give readers additional information about the work.

## Supplementary Appendix

### Table of Contents

|                                                                                                                                                                                                                                                                                                                                                                                                     |    |
|-----------------------------------------------------------------------------------------------------------------------------------------------------------------------------------------------------------------------------------------------------------------------------------------------------------------------------------------------------------------------------------------------------|----|
| List of Investigators .....                                                                                                                                                                                                                                                                                                                                                                         | 2  |
| Conflict of Interest Disclosures .....                                                                                                                                                                                                                                                                                                                                                              | 2  |
| Supplementary Methods .....                                                                                                                                                                                                                                                                                                                                                                         | 3  |
| Figure S1. Criteria for test inclusion in an analysis of the effectiveness of four vaccination regimens ([1] Ad26.COVS.S, [2] Ad26.COVS.S/Ad26.COVS.S, [3] Ad26.COVS.S/mRNA, [4] mRNA/mRNA/mRNA) against symptomatic SARS-CoV-2 Omicron infection among adults aged $\geq 18$ years tested in the <i>Increasing Community Access to Testing</i> platform, January 2, 2022–March 23, 2022.....       | 8  |
| Table S1. Characteristics of included tests in an analysis of the effectiveness of four vaccination regimens ([1] Ad26.COVS.S, [2] Ad26.COVS.S/Ad26.COVS.S, [3] Ad26.COVS.S/mRNA, [4] mRNA/mRNA/mRNA) against symptomatic SARS-CoV-2 Omicron infection among adults aged $\geq 18$ years tested in the <i>Increasing Community Access to Testing</i> platform, January 2, 2022–March 23, 2022. .... | 10 |
| Table S2. Representativeness of included SARS-CoV-2 tests in vaccine effectiveness analysis of adults aged $\geq 18$ years tested in the <i>Increasing Community Access to Testing</i> platform, January 2, 2022–March 23, 2022. ....                                                                                                                                                               | 18 |
| Figure S2. Vaccine effectiveness (VE) against symptomatic Omicron infection for vaccination regimens by mRNA COVID-19 vaccine product among adults aged $\geq 18$ years tested in the <i>Increasing Community Access to Testing</i> platform, January 2, 2022 to March 23, 2022. ....                                                                                                               | 21 |
| Sensitivity analysis .....                                                                                                                                                                                                                                                                                                                                                                          | 23 |
| Figure S3. Sensitivity analysis of vaccine effectiveness (VE) against symptomatic SARS-CoV-2 Omicron infection for four vaccination regimens among adults aged $\geq 18$ years tested in the <i>Increasing Community Access to Testing</i> platform, January 2, 2022 to March 23, 2022 including all tests regardless of self-report of prior SARS-CoV-2 infection.....                             | 24 |
| Table S3. Logistic regression model coefficients for main analysis (Figure 1 model), 14 days to 1 month since last vaccine dose .....                                                                                                                                                                                                                                                               | 26 |
| Table S4. Logistic regression model coefficients for main analysis (Figure 1 model), 2 to 4 months since last vaccine dose .....                                                                                                                                                                                                                                                                    | 27 |
| Table S5. Logistic regression model coefficients for sub-analysis by mRNA COVID-19 vaccine product (Figure S2 model), 14 days to 1 month since last vaccine dose .....                                                                                                                                                                                                                              | 28 |
| Table S6. Logistic regression model coefficients for sub-analysis by mRNA COVID-19 vaccine product (Figure S2 model), 2 to 4 months since last vaccine dose .....                                                                                                                                                                                                                                   | 30 |
| Table S7. Logistic regression model coefficients for sensitivity analysis (Figure S3 model), 14 days to 1 month since last vaccine dose .....                                                                                                                                                                                                                                                       | 31 |

Table S8. Logistic regression model coefficients for sensitivity analysis (Figure S3 model), 2 to 4 months since last vaccine dose ..... 32

References ..... 33

**List of Investigators**

- Emma K. Accorsi, PhD
- Amadea Britton, MD
- Nong Shang, PhD
- Katherine E. Fleming-Dutra, MD
- Ruth Link-Gelles, PhD
- Zachary R. Smith, MA
- Gordana Derado, PhD
- Joseph Miller, PhD
- \*Stephanie J. Schrag, DPhil
- \*Jennifer R. Verani, MD
- \*Co-senior authors

**Conflict of Interest Disclosures**

There are no disclosures to report for Dr. Accorsi, Dr. Britton, Dr. Shang, Dr. Fleming-Dutra, Dr. Link-Gelles, Mr. Smith, Dr. Derado, Dr. Miller, Dr. Schrag, or Dr. Verani.

## **Supplementary Methods**

Methods for vaccine effectiveness analyses using the *Increasing Community Access to Testing* (ICATT) platform have been previously described in depth.<sup>1-3</sup> Relevant methods sections are included again in this supplement for reference.

### *Study protocol approval*

This activity was determined to be public health surveillance as defined in 45 CFR 46.102(I) (US Department of Health and Human Services, Title 45 Code of Federal Regulations 46, Protection of Human Subjects); thus, it was not submitted for institutional review board approval and informed consent was not needed.

### *Data source*

Data from the *Increasing Community Access to Testing* (ICATT) platform were used. ICATT is a Department of Health and Human Services (HHS) program that contracts with four commercial pharmacy chains to facilitate drive-through SARS-CoV-2 testing nationally.<sup>1-4</sup> No-cost testing is available to anyone regardless of symptom or exposure status, and sites were selected to address COVID-19 health disparities by increasing access in racially and ethnically diverse communities and areas with moderate-to-high social vulnerability.<sup>4</sup> During the analysis period, contracted pharmacy chains did not all capture data on booster doses. This analysis was therefore limited to a single pharmacy chain which collected data on booster doses and provided 93.5% of tests platform-wide for adults aged  $\geq 18$  years during the analysis period.

Individuals registered online in advance for SARS-CoV-2 testing at a drive-through pharmacy site.<sup>1-3</sup> At the time of registration, individuals could select their desired test type (rapid nucleic acid amplification test [NAAT] performed by the pharmacy versus send-out laboratory-based NAAT). Individuals then answered a questionnaire (available in English or Spanish) to self-report demographic information (including race and ethnicity selected from fixed categories, shown in **Table S1**), COVID-19-like illness symptoms (fever, cough, shortness of breath, recent loss of sense of smell or taste, muscle pain, fatigue, chill, headache, sore throat, congestion or runny nose, vomiting, or diarrhea; reported to HHS as asymptomatic or symptomatic with  $\geq 1$  symptom), and vaccination status.<sup>1-3</sup> Race and ethnicity were collected as part of the HHS COVID-19 laboratory reporting requirements.<sup>5</sup> Self-reported COVID-19 vaccination data included number of doses received up to 4, and for each dose, vaccine product and month and year received. For doses reported in the same month or the month before test registration, the individual was asked whether the most recent dose was administered at least two weeks before test date.<sup>2,3</sup> Reporting of vaccination status was neither mandatory nor verified. Test registrants were also asked to self-report underlying health conditions, including immunocompromising conditions (defined in the questionnaire as “immunocompromising medications, solid organ or blood stem cell transplant, HIV, or other immunocompromising conditions”), and whether they had previously tested positive for SARS-CoV-2 (within 90 days and/or >90 days before test registration);<sup>2,3</sup> answers were not verified.

Nasal swabs were self-collected at drive-through sites and tested for SARS-CoV-2 either onsite by the pharmacy with the IDNow (Abbott Diagnostics Scarborough, Inc.) rapid NAAT or sent out for processing at contracted laboratories (using the TaqPath COVID-19 Combo Kit [Thermo Fischer Scientific, Inc.] or COVID-19 RT-PCR Test [Laboratory Corporation of America]).<sup>3,4</sup> De-identified questionnaire data,

specimen collection date, test type, test result, testing site location, and testing site census tract social vulnerability index (SVI)<sup>6</sup> were reported to HHS with an approximately 3-day lag.

### *Study design*

A test-negative, case-control analysis<sup>7</sup> was conducted to estimate VE of four vaccination regimens ([1] Ad26.COVS, [2] Ad26.COVS/Ad26.COVS, [3] Ad26.COVS/mRNA, [4] mRNA/mRNA/mRNA; mRNA vaccine doses were either BNT162b2 [Pfizer-BioNTech] or mRNA-1273 [Moderna]) against symptomatic infection. This analysis used rapid and laboratory-based NAATs from adults aged  $\geq 18$  years self-reporting  $\geq 1$  COVID-19-like illness symptom tested at the pharmacy chain from January 2, 2022, to March 23, 2022. The unit of analysis was tests; unique identifiers for individuals were not available. Cases were defined as those with positive SARS-CoV-2 NAAT, and controls were those with negative SARS-CoV-2 NAAT. Tests from individuals which met any of the following criteria were excluded: indeterminate test results, missing assay type, reported an immunocompromising condition (as COVID-19 vaccine recommendations differ for these individuals)<sup>8</sup>, missing data on sex or testing site census tract SVI, unknown vaccination status, receipt of a vaccination regimen other than the regimens of interest, receipt of the last vaccine dose within two weeks of the test date, vaccination before the month of the ACIP recommendation for primary or booster dose, receipt of a booster dose  $< 2$  or  $< 5$  months after the primary series for Ad26.COVS and mRNA primary series, respectively, or inconsistent vaccination information (e.g., reported receipt of vaccine but missing dose dates, reported no vaccine receipt but vaccine doses reported). In addition, we excluded tests from individuals reporting any prior positive test result (i.e., within 90 days and/or  $> 90$  days prior to testing). Prior SARS-CoV-2 infection could impact estimation of VE in multiple ways, including through infection-induced immunity providing protection to

the unvaccinated, which could bias VE towards the null, and through hybrid immunity in persons who had both infection-induced and vaccine-induced immunity.<sup>3</sup> Prior positives within the last 90 days might also represent recent prior infection with a non-Omicron variant or an at-home test during the same illness episode.

### *Exposure*

The exposures of interest were four vaccination regimens ([1] Ad26.COVS.S, [2] Ad26.COVS.S/Ad26.COVS.S, [3] Ad26.COVS.S/mRNA, [4] mRNA/mRNA/mRNA). Cases and controls were considered unvaccinated if tests were from individuals who received no COVID-19 vaccine before the SARS-CoV-2 test. Cases and controls were considered vaccinated if tests were from individuals who reported receiving the last dose of one of the four vaccination regimens  $\geq 2$  weeks before the SARS-CoV-2 test.

### *Outcome*

The outcome measure was symptomatic SARS-CoV-2 infection determined by positive NAAT in a person reporting COVID-19-like illness.

### *Statistical analysis*

Associations between symptomatic SARS-CoV-2 infection and vaccination were estimated by comparing the odds of prior vaccination with a regimen of interest ([1] Ad26.COVS.S, [2] Ad26.COVS.S/Ad26.COVS.S, [3] Ad26.COVS.S/mRNA, [4] mRNA/mRNA/mRNA ) versus no vaccination in cases versus controls using multivariable logistic regression. The odds ratio (OR) was used to estimate the vaccine effectiveness (VE), where  $VE = (1 - OR) \times 100\%$ . Regression models were adjusted for the number of

days between the start of the analysis period and test date (as a continuous variable with linear and quadratic terms), age group (18-24, 25-34, 35-44, 45-54, 55-64,  $\geq 65$  years), sex, race, ethnicity, testing site HHS region, testing site census tract SVI (dichotomized as  $0 < 0.5$  and  $\geq 0.5-1$ ), and number of underlying chronic conditions (0, 1, or  $\geq 2$ ) to control for possible confounding. Unknown race and ethnicity were coded as categorical levels within each variable to retain those tests in regression models.

We explored including test type (rapid vs laboratory-based NAAT) as a covariate in the model to assess the possibility test type (selected by the test registrant) could be a confounder associated both with likelihood of vaccination and likelihood of infection. However, VE estimates did not change when adjusting for test type. We therefore elected not to include test type in the model and report results of the two test types as a single outcome (with a positive or negative result).

VE was estimated at 14 days to 1 month and 2 to 4 months since receipt of the last vaccine dose. Since only vaccination month and year but not exact calendar dates of each dose were reported, months since last dose was calculated as the difference between the month and year of testing and the month and year of the last vaccine dose (at least 2 weeks after the dose).<sup>2,3</sup> The range of possible days after last dose for 14 days to 1 month since receipt of the last dose was 14-60 days and for 2 to 4 months since receipt of the last dose was 30-150 days (assuming 30 days per month). No adjustments were made for multiple comparisons.



**Figure S1.** Criteria for test inclusion in an analysis of the effectiveness of four vaccination regimens ([1] Ad26.COVID.S, [2] Ad26.COVID.S/Ad26.COVID.S, [3] Ad26.COVID.S/mRNA, [4] mRNA/mRNA/mRNA) against symptomatic SARS-CoV-2 Omicron infection among adults aged  $\geq 18$  years tested in the *Increasing Community Access to Testing* platform, January 2, 2022–March 23, 2022.

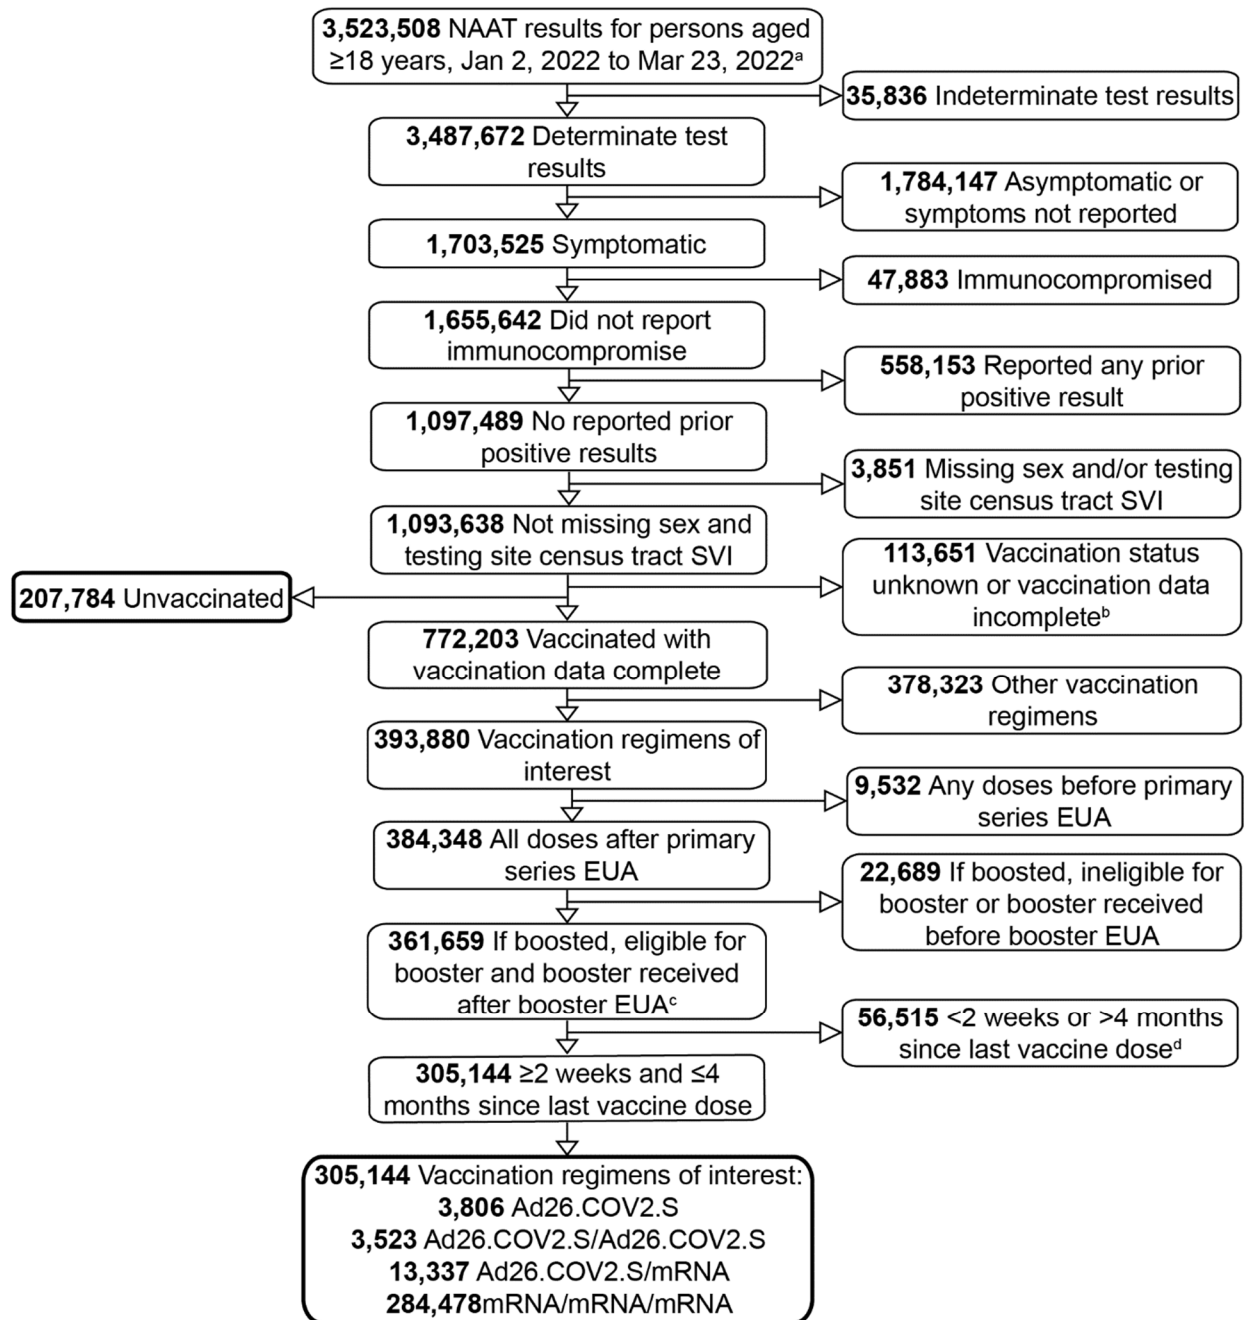

EUA=Emergency Use Authorization; NAAT=nucleic acid amplification test; SVI=Social vulnerability index

Data from the *Increasing Community Access to Testing* (ICATT) platform were used from adults aged  $\geq$  18 years tested from January 2, 2022 to March 23, 2022. During the analysis period, ICATT contracted four pharmacy chains which used different versions of the registration questionnaire and not all captured data on booster doses. This analysis was limited to a single chain which collected data on booster doses and performed 93.5% of tests platform-wide for adults during the analysis period. Nasal swabs were self-collected at drive-through sites and tested for SARS-CoV-2 either onsite with the IDNow (Abbott Diagnostics Scarborough, Inc.) rapid NAAT or at contracted laboratories using laboratory-based NAAT (TaqPath COVID-19 Combo Kit [Thermo Fischer Scientific, Inc] or COVID-19 RT-PCR Test [Laboratory Corporation of America]).

<sup>a</sup> 164 tests were removed because of reported ages older than 100 years.

<sup>b</sup> Individuals self-reported COVID-19 vaccination status at test registration, including the number of doses (up to four), product, and month and year of receipt for each vaccine dose. For doses received in the same month or the month prior to testing, registrants were asked whether the dose was received at least two weeks before testing. Vaccination data were considered incomplete if the number of doses reported did not match the products and dates reported.

<sup>c</sup> Persons who received a booster were considered to have been eligible for that booster if at least 2 or 5 months had elapsed between the last dose of the primary series and the booster dose for Ad26.COVS.2.S and mRNA primary series, respectively.

<sup>d</sup> Analysis was limited to tests from persons with  $\leq$ 4 months since last dose due to limited sample size for heterologous regimens at  $>$ 4 months since last dose.

**Table S1.** Characteristics of included tests in an analysis of the effectiveness of four vaccination regimens ([1] Ad26.COVS.S, [2] Ad26.COVS.S/Ad26.COVS.S, [3] Ad26.COVS.S/mRNA, [4] mRNA/mRNA/mRNA) against symptomatic SARS-CoV-2 Omicron infection among adults aged ≥18 years tested in the *Increasing Community Access to Testing* platform, January 2, 2022–March 23, 2022.

|                                                      | <b>Cases<br/>(SARS-<br/>CoV-2<br/>Positive)<br/>(n =<br/>187838)</b> | <b>Controls<br/>(SARS-<br/>CoV-2<br/>Negative<br/>) (n =<br/>325090)</b> | <b>Ad26.CO<br/>V2.S (n =<br/>3806)</b> | <b>Ad26.CO<br/>V2.S/Ad2<br/>6.COVS.S<br/>(n =<br/>3523)</b> | <b>Ad26.CO<br/>V2.S/<br/>mRNA (n<br/>= 13337)</b> | <b>mRNA/<br/>mRNA/<br/>mRNA (n<br/>=<br/>284478)</b> | <b>Unvaccin<br/>ated (n =<br/>207784)</b> | <b>Overall<br/>(n =<br/>512928)</b> |
|------------------------------------------------------|----------------------------------------------------------------------|--------------------------------------------------------------------------|----------------------------------------|-------------------------------------------------------------|---------------------------------------------------|------------------------------------------------------|-------------------------------------------|-------------------------------------|
| <b>SARS-CoV-2 test result</b>                        |                                                                      |                                                                          |                                        |                                                             |                                                   |                                                      |                                           |                                     |
| Positive                                             | 187838<br>(100.0%)                                                   | NA                                                                       | 1878<br>(49.3%)                        | 1518<br>(43.1%)                                             | 4097<br>(30.7%)                                   | 76175<br>(26.8%)                                     | 104170<br>(50.1%)                         | 187838<br>(36.6%)                   |
| Negative                                             | NA                                                                   | 325090<br>(100.0%)                                                       | 1928<br>(50.7%)                        | 2005<br>(56.9%)                                             | 9240<br>(69.3%)                                   | 208303<br>(73.2%)                                    | 103614<br>(49.9%)                         | 325090<br>(63.4%)                   |
| <b>Vaccination regimens and status<sup>a,b</sup></b> |                                                                      |                                                                          |                                        |                                                             |                                                   |                                                      |                                           |                                     |
| Ad26.COVS.S                                          | 1878<br>(1.0%)                                                       | 1928<br>(0.6%)                                                           | 3806<br>(100.0%)                       | NA                                                          | NA                                                | NA                                                   | NA                                        | 3806<br>(0.7%)                      |
| Ad26.COVS.S/A<br>d26.COVS.S                          | 1518<br>(0.8%)                                                       | 2005<br>(0.6%)                                                           | NA                                     | 3523<br>(100.0%)                                            | NA                                                | NA                                                   | NA                                        | 3523<br>(0.7%)                      |
| Ad26.COVS.S/<br>mRNA                                 | 4097<br>(2.2%)                                                       | 9240<br>(2.8%)                                                           | NA                                     | NA                                                          | 13337<br>(100.0%)                                 | NA                                                   | NA                                        | 13337<br>(2.6%)                     |
| mRNA/mRNA/<br>mRNA                                   | 76175<br>(40.6%)                                                     | 208303<br>(64.1%)                                                        | NA                                     | NA                                                          | NA                                                | 284478<br>(100.0%)                                   | NA                                        | 284478<br>(55.5%)                   |
| Unvaccinated                                         | 104170<br>(55.5%)                                                    | 103614<br>(31.9%)                                                        | NA                                     | NA                                                          | NA                                                | NA                                                   | 207784<br>(100.0%)                        | 207784<br>(40.5%)                   |
| <b>Age group (years)</b>                             |                                                                      |                                                                          |                                        |                                                             |                                                   |                                                      |                                           |                                     |
| 18-24                                                | 26181<br>(13.9%)                                                     | 40664<br>(12.5%)                                                         | 499<br>(13.1%)                         | 196<br>(5.6%)                                               | 1226<br>(9.2%)                                    | 20179<br>(7.1%)                                      | 44745<br>(21.5%)                          | 66845<br>(13.0%)                    |
| 25-34                                                | 48902<br>(26.0%)                                                     | 79015<br>(24.3%)                                                         | 1198<br>(31.5%)                        | 448<br>(12.7%)                                              | 3169<br>(23.8%)                                   | 55068<br>(19.4%)                                     | 68034<br>(32.7%)                          | 127917<br>(24.9%)                   |
| 35-44                                                | 37357<br>(19.9%)                                                     | 62863<br>(19.3%)                                                         | 846<br>(22.2%)                         | 596<br>(16.9%)                                              | 3085<br>(23.1%)                                   | 53271<br>(18.7%)                                     | 42422<br>(20.4%)                          | 100220<br>(19.5%)                   |
| 45-54                                                | 27181<br>(14.5%)                                                     | 46416<br>(14.3%)                                                         | 636<br>(16.7%)                         | 695<br>(19.7%)                                              | 2408<br>(18.1%)                                   | 43395<br>(15.3%)                                     | 26463<br>(12.7%)                          | 73597<br>(14.3%)                    |
| 55-64                                                | 24620<br>(13.1%)                                                     | 47173<br>(14.5%)                                                         | 472<br>(12.4%)                         | 964<br>(27.4%)                                              | 2430<br>(18.2%)                                   | 50948<br>(17.9%)                                     | 16979<br>(8.2%)                           | 71793<br>(14.0%)                    |
| 65+                                                  | 23597<br>(12.6%)                                                     | 48959<br>(15.1%)                                                         | 155<br>(4.1%)                          | 624<br>(17.7%)                                              | 1019<br>(7.6%)                                    | 61617<br>(21.7%)                                     | 9141<br>(4.4%)                            | 72556<br>(14.1%)                    |

|                                                    | <b>Cases<br/>(SARS-<br/>CoV-2<br/>Positive)<br/>(n =<br/>187838)</b> | <b>Controls<br/>(SARS-<br/>CoV-2<br/>Negative<br/>) (n =<br/>325090)</b> | <b>Ad26.CO<br/>V2.S (n =<br/>3806)</b> | <b>Ad26.CO<br/>V2.S/Ad2<br/>6.COVS2.S<br/>(n =<br/>3523)</b> | <b>Ad26.CO<br/>V2.S/<br/>mRNA (n<br/>= 13337)</b> | <b>mRNA/<br/>mRNA/ (n<br/>=<br/>284478)</b> | <b>Unvaccin<br/>ated (n =<br/>207784)</b> | <b>Overall<br/>(n =<br/>512928)</b> |
|----------------------------------------------------|----------------------------------------------------------------------|--------------------------------------------------------------------------|----------------------------------------|--------------------------------------------------------------|---------------------------------------------------|---------------------------------------------|-------------------------------------------|-------------------------------------|
| <b>Sex</b>                                         |                                                                      |                                                                          |                                        |                                                              |                                                   |                                             |                                           |                                     |
| Female                                             | 101924<br>(54.3%)                                                    | 203570<br>(62.6%)                                                        | 1747<br>(45.9%)                        | 1939<br>(55.0%)                                              | 7860<br>(58.9%)                                   | 179559<br>(63.1%)                           | 114389<br>(55.1%)                         | 305494<br>(59.6%)                   |
| Male                                               | 85914<br>(45.7%)                                                     | 121520<br>(37.4%)                                                        | 2059<br>(54.1%)                        | 1584<br>(45.0%)                                              | 5477<br>(41.1%)                                   | 104919<br>(36.9%)                           | 93395<br>(44.9%)                          | 207434<br>(40.4%)                   |
| <b>Race<sup>c</sup></b>                            |                                                                      |                                                                          |                                        |                                                              |                                                   |                                             |                                           |                                     |
| American<br>Indian or<br>Alaska Native             | 1958<br>(1.0%)                                                       | 2865<br>(0.9%)                                                           | 43 (1.1%)                              | 27 (0.8%)                                                    | 80 (0.6%)                                         | 1935<br>(0.7%)                              | 2738<br>(1.3%)                            | 4823<br>(0.9%)                      |
| Asian                                              | 9563<br>(5.1%)                                                       | 21326<br>(6.6%)                                                          | 109<br>(2.9%)                          | 197<br>(5.6%)                                                | 1088<br>(8.2%)                                    | 25464<br>(9.0%)                             | 4031<br>(1.9%)                            | 30889<br>(6.0%)                     |
| Black or African<br>American                       | 23444<br>(12.5%)                                                     | 37903<br>(11.7%)                                                         | 391<br>(10.3%)                         | 347<br>(9.8%)                                                | 787<br>(5.9%)                                     | 19192<br>(6.7%)                             | 40630<br>(19.6%)                          | 61347<br>(12.0%)                    |
| Native<br>Hawaiian or<br>Other Pacific<br>Islander | 1067<br>(0.6%)                                                       | 1681<br>(0.5%)                                                           | 37 (1.0%)                              | 13 (0.4%)                                                    | 42 (0.3%)                                         | 1011<br>(0.4%)                              | 1645<br>(0.8%)                            | 2748<br>(0.5%)                      |
| White                                              | 134858<br>(71.8%)                                                    | 235195<br>(72.3%)                                                        | 2844<br>(74.7%)                        | 2648<br>(75.2%)                                              | 10278<br>(77.1%)                                  | 216440<br>(76.1%)                           | 137843<br>(66.3%)                         | 370053<br>(72.1%)                   |
| Not Reported                                       | 16948<br>(9.0%)                                                      | 26120<br>(8.0%)                                                          | 382<br>(10.0%)                         | 291<br>(8.3%)                                                | 1062<br>(8.0%)                                    | 20436<br>(7.2%)                             | 20897<br>(10.1%)                          | 43068<br>(8.4%)                     |
| <b>Ethnicity<sup>c</sup></b>                       |                                                                      |                                                                          |                                        |                                                              |                                                   |                                             |                                           |                                     |
| Hispanic/Latino                                    | 29361<br>(15.6%)                                                     | 43622<br>(13.4%)                                                         | 466<br>(12.2%)                         | 485<br>(13.8%)                                               | 1677<br>(12.6%)                                   | 34342<br>(12.1%)                            | 36013<br>(17.3%)                          | 72983<br>(14.2%)                    |
| Not Reported                                       | 15244<br>(8.1%)                                                      | 24226<br>(7.5%)                                                          | 427<br>(11.2%)                         | 302<br>(8.6%)                                                | 886<br>(6.6%)                                     | 19202<br>(6.7%)                             | 18653<br>(9.0%)                           | 39470<br>(7.7%)                     |
| <b>HHS Region<sup>d</sup></b>                      |                                                                      |                                                                          |                                        |                                                              |                                                   |                                             |                                           |                                     |
| South Atlantic                                     | 45619<br>(24.3%)                                                     | 70312<br>(21.6%)                                                         | 772<br>(20.3%)                         | 858<br>(24.4%)                                               | 2562<br>(19.2%)                                   | 61831<br>(21.7%)                            | 49908<br>(24.0%)                          | 115931<br>(22.6%)                   |
| East North<br>Central                              | 33925<br>(18.1%)                                                     | 68706<br>(21.1%)                                                         | 744<br>(19.5%)                         | 687<br>(19.5%)                                               | 3087<br>(23.1%)                                   | 59942<br>(21.1%)                            | 38171<br>(18.4%)                          | 102631<br>(20.0%)                   |

|                                                                       | <b>Cases<br/>(SARS-<br/>CoV-2<br/>Positive)<br/>(n =<br/>187838)</b> | <b>Controls<br/>(SARS-<br/>CoV-2<br/>Negative<br/>) (n =<br/>325090)</b> | <b>Ad26.CO<br/>V2.S (n =<br/>3806)</b> | <b>Ad26.CO<br/>V2.S/Ad2<br/>6.COVS2.S<br/>(n =<br/>3523)</b> | <b>Ad26.CO<br/>V2.S/<br/>mRNA (n<br/>= 13337)</b> | <b>mRNA/<br/>mRNA (n<br/>=<br/>284478)</b> | <b>Unvaccin<br/>ated (n =<br/>207784)</b> | <b>Overall<br/>(n =<br/>512928)</b> |
|-----------------------------------------------------------------------|----------------------------------------------------------------------|--------------------------------------------------------------------------|----------------------------------------|--------------------------------------------------------------|---------------------------------------------------|--------------------------------------------|-------------------------------------------|-------------------------------------|
| West South<br>Central                                                 | 28154<br>(15.0%)                                                     | 44405<br>(13.7%)                                                         | 504<br>(13.2%)                         | 437<br>(12.4%)                                               | 1502<br>(11.3%)                                   | 35192<br>(12.4%)                           | 34924<br>(16.8%)                          | 72559<br>(14.1%)                    |
| Mountain                                                              | 18173<br>(9.7%)                                                      | 31040<br>(9.5%)                                                          | 436<br>(11.5%)                         | 326<br>(9.3%)                                                | 1233<br>(9.2%)                                    | 28752<br>(10.1%)                           | 18466<br>(8.9%)                           | 49213<br>(9.6%)                     |
| East South<br>Central                                                 | 19979<br>(10.6%)                                                     | 26582<br>(8.2%)                                                          | 356<br>(9.4%)                          | 244<br>(6.9%)                                                | 793<br>(5.9%)                                     | 19844<br>(7.0%)                            | 25324<br>(12.2%)                          | 46561<br>(9.1%)                     |
| West North<br>Central                                                 | 14559<br>(7.8%)                                                      | 27648<br>(8.5%)                                                          | 300<br>(7.9%)                          | 251<br>(7.1%)                                                | 1534<br>(11.5%)                                   | 23735<br>(8.3%)                            | 16387<br>(7.9%)                           | 42207<br>(8.2%)                     |
| Pacific                                                               | 12143<br>(6.5%)                                                      | 22304<br>(6.9%)                                                          | 284<br>(7.5%)                          | 280<br>(7.9%)                                                | 948<br>(7.1%)                                     | 21545<br>(7.6%)                            | 11390<br>(5.5%)                           | 34447<br>(6.7%)                     |
| Mid-Atlantic                                                          | 9602<br>(5.1%)                                                       | 20741<br>(6.4%)                                                          | 265<br>(7.0%)                          | 322<br>(9.1%)                                                | 805<br>(6.0%)                                     | 20189<br>(7.1%)                            | 8762<br>(4.2%)                            | 30343<br>(5.9%)                     |
| New England                                                           | 5072<br>(2.7%)                                                       | 11401<br>(3.5%)                                                          | 136<br>(3.6%)                          | 109<br>(3.1%)                                                | 784<br>(5.9%)                                     | 11803<br>(4.1%)                            | 3641<br>(1.8%)                            | 16473<br>(3.2%)                     |
| Puerto Rico                                                           | 612<br>(0.3%)                                                        | 1951<br>(0.6%)                                                           | 9 (0.2%)                               | 9 (0.3%)                                                     | 89 (0.7%)                                         | 1645<br>(0.6%)                             | 811<br>(0.4%)                             | 2563<br>(0.5%)                      |
| <b>Site census tract social vulnerability index (SVI)<sup>e</sup></b> |                                                                      |                                                                          |                                        |                                                              |                                                   |                                            |                                           |                                     |
| 0 - < 0.5<br>(less<br>vulnerable)                                     | 84502<br>(45.0%)                                                     | 161922<br>(49.8%)                                                        | 1661<br>(43.6%)                        | 1759<br>(49.9%)                                              | 7484<br>(56.1%)                                   | 156181<br>(54.9%)                          | 79339<br>(38.2%)                          | 246424<br>(48.0%)                   |
| 0.5 - 1.0 (more<br>vulnerable)                                        | 103336<br>(55.0%)                                                    | 163168<br>(50.2%)                                                        | 2145<br>(56.4%)                        | 1764<br>(50.1%)                                              | 5853<br>(43.9%)                                   | 128297<br>(45.1%)                          | 128445<br>(61.8%)                         | 266504<br>(52.0%)                   |
| <b>Test Type</b>                                                      |                                                                      |                                                                          |                                        |                                                              |                                                   |                                            |                                           |                                     |
| Laboratory-<br>based NAAT <sup>f</sup>                                | 74243<br>(39.5%)                                                     | 122213<br>(37.6%)                                                        | 1312<br>(34.5%)                        | 1380<br>(39.2%)                                              | 5824<br>(43.7%)                                   | 123842<br>(43.5%)                          | 64098<br>(30.8%)                          | 196456<br>(38.3%)                   |
| Rapid NAAT <sup>g</sup>                                               | 113595<br>(60.5%)                                                    | 202877<br>(62.4%)                                                        | 2494<br>(65.5%)                        | 2143<br>(60.8%)                                              | 7513<br>(56.3%)                                   | 160636<br>(56.5%)                          | 143686<br>(69.2%)                         | 316472<br>(61.7%)                   |
| <b>Underlying chronic conditions<sup>h</sup></b>                      |                                                                      |                                                                          |                                        |                                                              |                                                   |                                            |                                           |                                     |
| No conditions                                                         | 117737<br>(62.7%)                                                    | 188735<br>(58.1%)                                                        | 2574<br>(67.6%)                        | 1789<br>(50.8%)                                              | 8200<br>(61.5%)                                   | 152087<br>(53.5%)                          | 141822<br>(68.3%)                         | 306472<br>(59.7%)                   |
| One condition                                                         | 40433<br>(21.5%)                                                     | 75800<br>(23.3%)                                                         | 787<br>(20.7%)                         | 874<br>(24.8%)                                               | 3026<br>(22.7%)                                   | 70403<br>(24.7%)                           | 41143<br>(19.8%)                          | 116233<br>(22.7%)                   |
| Two or more<br>conditions                                             | 29668<br>(15.8%)                                                     | 60555<br>(18.6%)                                                         | 445<br>(11.7%)                         | 860<br>(24.4%)                                               | 2111<br>(15.8%)                                   | 61988<br>(21.8%)                           | 24819<br>(11.9%)                          | 90223<br>(17.6%)                    |

|                                                   | <b>Cases<br/>(SARS-<br/>CoV-2<br/>Positive)<br/>(n =<br/>187838)</b> | <b>Controls<br/>(SARS-<br/>CoV-2<br/>Negative<br/>) (n =<br/>325090)</b> | <b>Ad26.CO<br/>V2.S (n =<br/>3806)</b> | <b>Ad26.CO<br/>V2.S/Ad2<br/>6.CO2.S<br/>(n =<br/>3523)</b> | <b>Ad26.CO<br/>V2.S/<br/>mRNA (n<br/>= 13337)</b> | <b>mRNA/<br/>mRNA/ (n<br/>= 284478)</b> | <b>Unvaccin<br/>ated (n =<br/>207784)</b> | <b>Overall<br/>(n =<br/>512928)</b> |
|---------------------------------------------------|----------------------------------------------------------------------|--------------------------------------------------------------------------|----------------------------------------|------------------------------------------------------------|---------------------------------------------------|-----------------------------------------|-------------------------------------------|-------------------------------------|
| High blood pressure                               | 34864<br>(18.6%)                                                     | 66927<br>(20.6%)                                                         | 495<br>(13.0%)                         | 1024<br>(29.1%)                                            | 2406<br>(18.0%)                                   | 71081<br>(25.0%)                        | 26785<br>(12.9%)                          | 101791<br>(19.8%)                   |
| Overweight                                        | 26335<br>(14.0%)                                                     | 59622<br>(18.3%)                                                         | 451<br>(11.8%)                         | 749<br>(21.3%)                                             | 2500<br>(18.7%)                                   | 60982<br>(21.4%)                        | 21275<br>(10.2%)                          | 85957<br>(16.8%)                    |
| Smoking                                           | 22298<br>(11.9%)                                                     | 38484<br>(11.8%)                                                         | 490<br>(12.9%)                         | 509<br>(14.4%)                                             | 1269<br>(9.5%)                                    | 30406<br>(10.7%)                        | 28108<br>(13.5%)                          | 60782<br>(11.9%)                    |
| Diabetes                                          | 13314<br>(7.1%)                                                      | 24752<br>(7.6%)                                                          | 176<br>(4.6%)                          | 384<br>(10.9%)                                             | 875<br>(6.6%)                                     | 26937<br>(9.5%)                         | 9694<br>(4.7%)                            | 38066<br>(7.4%)                     |
| Heart condition                                   | 9570<br>(5.1%)                                                       | 19018<br>(5.9%)                                                          | 105<br>(2.8%)                          | 240<br>(6.8%)                                              | 530<br>(4.0%)                                     | 19992<br>(7.0%)                         | 7721<br>(3.7%)                            | 28588<br>(5.6%)                     |
| Lung disease or asthma                            | 7895<br>(4.2%)                                                       | 19354<br>(6.0%)                                                          | 135<br>(3.5%)                          | 195<br>(5.5%)                                              | 664<br>(5.0%)                                     | 17784<br>(6.3%)                         | 8471<br>(4.1%)                            | 27249<br>(5.3%)                     |
| Kidney disease                                    | 757<br>(0.4%)                                                        | 1377<br>(0.4%)                                                           | 12 (0.3%)                              | 18 (0.5%)                                                  | 52 (0.4%)                                         | 1411<br>(0.5%)                          | 641<br>(0.3%)                             | 2134<br>(0.4%)                      |
| Liver disease                                     | 363<br>(0.2%)                                                        | 739<br>(0.2%)                                                            | 6 (0.2%)                               | 12 (0.3%)                                                  | 24 (0.2%)                                         | 656<br>(0.2%)                           | 404<br>(0.2%)                             | 1102<br>(0.2%)                      |
| <b>Detailed vaccination history<sup>a,b</sup></b> |                                                                      |                                                                          |                                        |                                                            |                                                   |                                         |                                           |                                     |
| Unvaccinated                                      | 104170<br>(55.5%)                                                    | 103614<br>(31.9%)                                                        | NA                                     | NA                                                         | NA                                                | NA                                      | 207784<br>(100.0%)                        | 207784<br>(40.5%)                   |
| BNT162b2 & BNT162b2 & BNT162b2                    | 44302<br>(23.6%)                                                     | 111281<br>(34.2%)                                                        | NA                                     | NA                                                         | NA                                                | 155583<br>(54.7%)                       | NA                                        | 155583<br>(30.3%)                   |
| mRNA-1273 & mRNA-1273 & mRNA-1273                 | 26065<br>(13.9%)                                                     | 78937<br>(24.3%)                                                         | NA                                     | NA                                                         | NA                                                | 105002<br>(36.9%)                       | NA                                        | 105002<br>(20.5%)                   |
| BNT162b2 & BNT162b2 & mRNA-1273                   | 2942<br>(1.6%)                                                       | 9998<br>(3.1%)                                                           | NA                                     | NA                                                         | NA                                                | 12940<br>(4.5%)                         | NA                                        | 12940<br>(2.5%)                     |
| mRNA-1273 & mRNA-1273 & BNT162b2                  | 2715<br>(1.4%)                                                       | 7670<br>(2.4%)                                                           | NA                                     | NA                                                         | NA                                                | 10385<br>(3.7%)                         | NA                                        | 10385<br>(2.0%)                     |
| Ad26.CO2.S & mRNA-1273                            | 2043<br>(1.1%)                                                       | 4865<br>(1.5%)                                                           | NA                                     | NA                                                         | 6908<br>(51.8%)                                   | NA                                      | NA                                        | 6908<br>(1.3%)                      |
| Ad26.CO2.S & BNT162b2                             | 2054<br>(1.1%)                                                       | 4375<br>(1.3%)                                                           | NA                                     | NA                                                         | 6429<br>(48.2%)                                   | NA                                      | NA                                        | 6429<br>(1.3%)                      |

|                                                              | <b>Cases<br/>(SARS-<br/>CoV-2<br/>Positive)<br/>(n =<br/>187838)</b> | <b>Controls<br/>(SARS-<br/>CoV-2<br/>Negative<br/>) (n =<br/>325090)</b> | <b>Ad26.CO<br/>V2.S (n =<br/>3806)</b> | <b>Ad26.CO<br/>V2.S/Ad2<br/>6.CO2.S<br/>(n =<br/>3523)</b> | <b>Ad26.CO<br/>V2.S/<br/>mRNA (n<br/>= 13337)</b> | <b>mRNA/<br/>mRNA/<br/>mRNA (n<br/>=<br/>284478)</b> | <b>Unvaccin<br/>ated (n =<br/>207784)</b> | <b>Overall<br/>(n =<br/>512928)</b> |
|--------------------------------------------------------------|----------------------------------------------------------------------|--------------------------------------------------------------------------|----------------------------------------|------------------------------------------------------------|---------------------------------------------------|------------------------------------------------------|-------------------------------------------|-------------------------------------|
| Ad26.CO2.S                                                   | 1878<br>(1.0%)                                                       | 1928<br>(0.6%)                                                           | 3806<br>(100.0%)                       | NA                                                         | NA                                                | NA                                                   | NA                                        | 3806<br>(0.7%)                      |
| Ad26.CO2.S &<br>Ad26.CO2.S                                   | 1518<br>(0.8%)                                                       | 2005<br>(0.6%)                                                           | NA                                     | 3523<br>(100.0%)                                           | NA                                                | NA                                                   | NA                                        | 3523<br>(0.7%)                      |
| BNT162b2 &<br>mRNA-1273 &<br>BNT162b2                        | 54<br>(<0.1%)                                                        | 121<br>(<0.1%)                                                           | NA                                     | NA                                                         | NA                                                | 175<br>(0.1%)                                        | NA                                        | 175<br>(<0.1%)                      |
| BNT162b2 &<br>mRNA-1273 &<br>mRNA-1273                       | 36<br>(<0.1%)                                                        | 133<br>(<0.1%)                                                           | NA                                     | NA                                                         | NA                                                | 169<br>(0.1%)                                        | NA                                        | 169<br>(<0.1%)                      |
| mRNA-1273 &<br>BNT162b2 &<br>BNT162b2                        | 35<br>(<0.1%)                                                        | 91<br>(<0.1%)                                                            | NA                                     | NA                                                         | NA                                                | 126<br>(<0.1%)                                       | NA                                        | 126<br>(<0.1%)                      |
| mRNA-1273 &<br>BNT162b2 &<br>mRNA-1273                       | 26<br>(<0.1%)                                                        | 72<br>(<0.1%)                                                            | NA                                     | NA                                                         | NA                                                | 98<br>(<0.1%)                                        | NA                                        | 98<br>(<0.1%)                       |
| <b>Days from January 2, 2022 until testing</b>               |                                                                      |                                                                          |                                        |                                                            |                                                   |                                                      |                                           |                                     |
| Median (IQR)                                                 | 22.0<br>(19.0)                                                       | 26.0<br>(27.0)                                                           | 24.0<br>(19.0)                         | 24.0<br>(22.0)                                             | 25.0<br>(24.0)                                    | 25.0<br>(24.0)                                       | 24.0<br>(23.0)                            | 24.0<br>(24.0)                      |
| Min, Max                                                     | 1.0, 80.0                                                            | 1.0, 80.0                                                                | 1.0, 80.0                              | 1.0, 80.0                                                  | 1.0, 80.0                                         | 1.0, 80.0                                            | 1.0, 80.0                                 | 1.0, 80.0                           |
| <b>Months between primary series and testing<sup>i</sup></b> |                                                                      |                                                                          |                                        |                                                            |                                                   |                                                      |                                           |                                     |
| Median (IQR)                                                 | 10.0 (1.0)                                                           | 10.0 (2.0)                                                               | 3.0 (2.0)                              | 10.0 (1.0)                                                 | 10.0 (1.0)                                        | 10.0 (2.0)                                           | NA                                        | 10.0 (2.0)                          |
| Min, Max                                                     | 0.0, 14.0                                                            | 0.0, 15.0                                                                | 0.0, 4.0                               | 2.0, 13.0                                                  | 2.0, 13.0                                         | 5.0, 15.0                                            | NA                                        | 0.0, 15.0                           |
| Missing (no<br>primary series)                               | 104170<br>(55.5%)                                                    | 103614<br>(31.9%)                                                        | NA                                     | NA                                                         | NA                                                | NA                                                   | 207784<br>(100.0%)                        | 207784<br>(40.5%)                   |

|                                                                   | Cases<br>(SARS-<br>CoV-2<br>Positive)<br>(n =<br>187838) | Controls<br>(SARS-<br>CoV-2<br>Negative)<br>(n =<br>325090) | Ad26.CO<br>V2.S (n =<br>3806) | Ad26.CO<br>V2.S/Ad2<br>6.CO2.S<br>(n =<br>3523) | Ad26.CO<br>V2.S/<br>mRNA (n<br>= 13337) | mRNA/<br>mRNA/<br>mRNA (n<br>=<br>284478) | Unvaccin<br>ated (n =<br>207784) | Overall<br>(n =<br>512928) |
|-------------------------------------------------------------------|----------------------------------------------------------|-------------------------------------------------------------|-------------------------------|-------------------------------------------------|-----------------------------------------|-------------------------------------------|----------------------------------|----------------------------|
| <b>Months between booster dose and testing<sup>i</sup></b>        |                                                          |                                                             |                               |                                                 |                                         |                                           |                                  |                            |
| Median (IQR)                                                      | 2.0 (2.0)                                                | 2.0 (2.0)                                                   | NA                            | 2.0 (2.0)                                       | 2.0 (2.0)                               | 2.0 (2.0)                                 | NA                               | 2.0 (2.0)                  |
| Min, Max                                                          | 0.0, 4.0                                                 | 0.0, 4.0                                                    | NA                            | 0.0, 4.0                                        | 0.0, 4.0                                | 0.0, 4.0                                  | NA                               | 0.0, 4.0                   |
| Missing (no<br>booster)                                           | 106048<br>(56.5%)                                        | 105542<br>(32.5%)                                           | 3806<br>(100.0%)              | NA                                              | NA                                      | NA                                        | 207784<br>(100.0%)               | 211590<br>(41.3%)          |
| <b>Months between primary series and booster dose<sup>j</sup></b> |                                                          |                                                             |                               |                                                 |                                         |                                           |                                  |                            |
| Median (IQR)                                                      | 7.0 (1.0)                                                | 8.0 (1.0)                                                   | NA                            | 8.0 (1.0)                                       | 8.0 (1.0)                               | 7.0 (1.0)                                 | NA                               | 7.0 (1.0)                  |
| Min, Max                                                          | 2.0, 13.0                                                | 2.0, 13.0                                                   | NA                            | 2.0, 12.0                                       | 2.0, 12.0                               | 5.0, 13.0                                 | NA                               | 2.0, 13.0                  |
| Missing (no<br>primary series<br>or no booster)                   | 106048<br>(56.5%)                                        | 105542<br>(32.5%)                                           | 3806<br>(100.0%)              | NA                                              | NA                                      | NA                                        | 207784<br>(100.0%)               | 211590<br>(41.3%)          |

IQR=interquartile range; NA=not applicable; NAAT=Nucleic acid amplification test; SVI=Social

vulnerability index

<sup>a</sup> Cases and controls were considered vaccinated if tests were from persons who reported receiving the most recent vaccine dose  $\geq 2$  weeks before their SARS-CoV-2 test date.

<sup>b</sup> Individuals self-reported COVID-19 vaccination status at test registration, including the number of doses (up to four), product, and month and year of receipt for each vaccine dose. For doses received in the same month or the month prior to testing, registrants were asked whether the dose was received at least two weeks before testing. Vaccination reporting was neither mandatory nor verified.

<sup>c</sup> Race and ethnicity were self-reported from fixed categories provided at test registration. The question regarding race was required on the questionnaire, and registrants were only able to select one category or select "Decline to answer", which was coded as unknown race. Unknown race (n=43,068) and



ethnicity (n=39,470) were coded as categorical levels within each variable to retain those tests in regression models.

<sup>d</sup> Regions defined as: East North Central (Illinois, Indiana, Michigan, Ohio, and Wisconsin), South Atlantic (Delaware, Florida, Georgia, Maryland, North Carolina, South Carolina, Virginia, Washington, DC, and West Virginia), West South Central (Arkansas, Louisiana, Oklahoma, and Texas), Mountain (Arizona, Colorado, Idaho, Montana, Nevada, New Mexico, Utah, and Wyoming), East South Central (Alabama, Kentucky, Mississippi, and Tennessee), West North Central (Iowa, Kansas, Minnesota, Missouri, Nebraska, North Dakota, and South Dakota), Mid-Atlantic (New Jersey, New York, and Pennsylvania), Pacific (Alaska, California, Hawaii, Oregon, and Washington), New England (Connecticut, Maine, Massachusetts, New Hampshire, Rhode Island, and Vermont), and Puerto Rico.

<sup>e</sup> Testing site census tract SVI was an available variable in ICATT data. SVI is assigned for all US census tracts by CDC/ATSDR (Agency for Toxic Substances and Disease Registry) based on US Census data. Higher SVI indicates greater social vulnerability.

<sup>f</sup> Laboratory-based NAAT was performed by contract laboratories on self-collected nasal swabs using either the TaqPath COVID-19 Combo Kit (Thermo Fischer Scientific, Inc) or COVID-19 RT-PCR Test (Laboratory Corporation of America). Data regarding specimen collection date, test type and test results were directly reported by the pharmacy to ICATT.

<sup>g</sup> Rapid NAAT was performed onsite by the pharmacy on self-collected nasal swabs using IDNow (Abbott Diagnostics Scarborough, Inc.). Data regarding specimen collection date, test type and test results were directly reported by the pharmacy to ICATT.

<sup>h</sup> Test registrants were asked to report whether a healthcare worker had ever diagnosed them with heart conditions; high blood pressure; overweight or obesity; diabetes; current or former smoker;

kidney failure or end stage renal disease; cirrhosis of the liver; or chronic lung disease, such as COPD, moderate to severe asthma, cystic fibrosis, or pulmonary embolism.

<sup>i</sup> Months between the primary series or booster dose and testing were calculated as the difference between the month and year of testing and the month and year of the last primary series dose or booster dose, respectively. Tests from participants with <2 weeks between the date of the last dose and the date of testing were excluded.

<sup>j</sup> For all boosted regimens ([2]Ad26.COVID.S/Ad26.COVID.S, [3]Ad26.COVID.S/mRNA, [4]mRNA/mRNA/mRNA) tests were excluded if <2 or <5 months for Ad26.COVID.S and mRNA primary series, respectively, had elapsed between the last dose of the primary series and the booster dose. For Ad26.COVID.S we did not limit by months since primary series receipt; however, tests with 14 days to 1 month since primary series receipt were not eligible for a booster dose unlike those with  $\geq 2$  months.

**Table S2.** Representativeness of included SARS-CoV-2 tests in vaccine effectiveness analysis of adults aged  $\geq 18$  years tested in the *Increasing Community Access to Testing* platform, January 2, 2022–March 23, 2022.

| Category                                 | Details                                                                                                                                                                                                                                                                                                                                                                                                                                                                                                                                                                                                                                                                                                                                                                                                                                                                                                                   |
|------------------------------------------|---------------------------------------------------------------------------------------------------------------------------------------------------------------------------------------------------------------------------------------------------------------------------------------------------------------------------------------------------------------------------------------------------------------------------------------------------------------------------------------------------------------------------------------------------------------------------------------------------------------------------------------------------------------------------------------------------------------------------------------------------------------------------------------------------------------------------------------------------------------------------------------------------------------------------|
| Disease under investigation              | Symptomatic SARS-CoV-2 infection <sup>a</sup> defined as $\geq 1$ COVID-19-like illness symptom (fever, cough, shortness of breath, recent loss of sense of smell or taste, muscle pain, fatigue, chill, headache, sore throat, congestion or runny nose, vomiting, diarrhea).                                                                                                                                                                                                                                                                                                                                                                                                                                                                                                                                                                                                                                            |
| Special considerations related to:       |                                                                                                                                                                                                                                                                                                                                                                                                                                                                                                                                                                                                                                                                                                                                                                                                                                                                                                                           |
| Sex                                      | Rates of SARS-CoV-2 infection are similar among those of male and female sex. In data on cumulative COVID-19 cases reported by U.S. states and territories to CDC as of March 4, 2022, 53.7% of all reported cases in adults 18 and older for which sex was known were from those of female sex <sup>b</sup> , while the U.S. population aged $\geq 18$ years is 51.3% female. <sup>c</sup>                                                                                                                                                                                                                                                                                                                                                                                                                                                                                                                               |
| Age                                      | Rates of symptomatic SARS-CoV-2 infection in different age groups have been dynamic throughout the pandemic. The estimated rate of symptomatic infection per 100,000 population between February 2020 and September 2021 was highest among adults 18-49 years of age and lowest among adults $\geq 65$ years of age. <sup>d</sup>                                                                                                                                                                                                                                                                                                                                                                                                                                                                                                                                                                                         |
| Race or ethnic group                     | COVID-19 has disproportionately affected persons from racial and ethnic minority groups, putting them at increased risk of SARS-CoV-2 infection. CDC identifies race and ethnicity as risk markers for other factors that affect health, including socioeconomic status, access to health care, and increased occupational exposure to the virus, e.g., frontline, essential, and critical infrastructure workers. <sup>e</sup> In data on cumulative COVID-19 cases reported by U.S. states and territories to CDC as of March 4, 2022, the risk of SARS-CoV-2 infection after adjusting for age was 1.5 times higher in non-Hispanic American Indian or Alaska Natives persons than in non-Hispanic White persons, 1.5 times higher in Hispanic or Latino persons than non-Hispanic White persons, and 1.1 times higher in non-Hispanic Black or African American persons than non-Hispanic White persons. <sup>e</sup> |
| Geography                                | Geographic differences in COVID-19 case rates have been observed both globally by country and within the U.S. by urban-rural classification <sup>f</sup> and region. <sup>g</sup>                                                                                                                                                                                                                                                                                                                                                                                                                                                                                                                                                                                                                                                                                                                                         |
| Other considerations                     | The CDC/ATSDR Social Vulnerability Index (SVI) uses 15 variables from the US Census to identify socially vulnerable communities that may need support before, during, and after public health emergencies. County-level SVI is associated with COVID-19 case rates, but the association is dynamic. At times during the pandemic, counties with high SVI have had higher COVID-19 case rates, while at other times counties with low SVI have had higher COVID-19 case rates. <sup>h,i,j,k</sup>                                                                                                                                                                                                                                                                                                                                                                                                                          |
| Overall representativeness of this study | The outcome of symptomatic SARS-CoV-2 infection in this analysis likely reflects mild disease as it is defined as $\geq 1$ COVID-19-like illness symptom. No clinical assessment was performed at the time of testing. The tests included in this                                                                                                                                                                                                                                                                                                                                                                                                                                                                                                                                                                                                                                                                         |

study were more frequently from individuals reporting female sex than the general U.S. population (in this analysis 59.6% of tests for which sex was not missing were from those reporting female sex; 51.3% of the U.S population is female).<sup>l</sup> ICATT did not collect information on gender identity. Included tests were more frequently from individuals aged 18-24 years (13.1% of tests in the analysis vs 11.8% of the U.S. population ≥ 18 years), 25-34 (25.0% vs 18.0%), and 35-44 (19.5% vs 16.3%). Tests were less frequently from individuals aged 45-54 (14.3% of tests in the analysis vs 16.0% of the U.S. population), 55-64 (14.0% vs 16.6%), and ≥65 years (14.1% vs 21.2%). Reporting of race and ethnicity was required by ICATT test sites (options included American Indian or Alaska Native, Asian, Black or African American, Native Hawaiian or Other Pacific Islander, White, or decline to answer; Hispanic or Latino, Non-Hispanic or Latino, or decline to answer). The questionnaire used by the pharmacy chain included in this analysis did not give the option to report multiple races and these individuals may have been misclassified or chosen to decline reporting race. Among included tests for which race was not missing, the distribution of reported race and ethnicity was similar to that of the U.S. population aged ≥18 years (American Indian or Alaska Native: 1.0% in the analysis vs 1.2% in the U.S. population; Asian: 6.6% vs 6.2%; Black or African American: 13.0% vs 13.2%; Native Hawaiian or Other Pacific Islander: 0.6% vs 0.2%; White: 78.8% vs 79.1%; Hispanic or Latino ethnicity: 15.4% vs 16.4%).<sup>l,m</sup> This analysis was limited to testing sites in the U.S. The geographic distribution of tests was similar to the distribution of the U.S. population (tests included from 49 states [all except North Dakota], Washington, DC and Puerto Rico). ICATT testing sites are not available in U.S. territories other than Puerto Rico. Urban-rural differences were not assessed in this study.

- a. The outcome of this study was symptomatic SARS-CoV-2 infection. Other COVID-19 outcomes—such as hospitalization and death, may have different relationships with these categories.
- b. CDC. COVID-19 Case Surveillance Public Use Data. Website: <https://data.cdc.gov/Case-Surveillance/COVID-19-Case-Surveillance-Public-Use-Data/vbim-akqf>. Updated 3/4/22. Accessed 4/6/22.
- c. U.S. Census Bureau. 2016-2020 American Community Survey 5-Year Estimates: ACS Demographic and Housing Estimates. Website: <https://data.census.gov/cedsci/table?q=2020%20ACS&tid=ACSDP5Y2020.DP05>. Accessed 3/30/22.
- d. CDC. Estimated rates of COVID-19 disease outcomes per 100,000 by age group—United States, February 2020–September 2021. Website: <https://www.cdc.gov/coronavirus/2019-ncov/cases-updates/burden.html>. Updated 11/16/21. Accessed 3/24/22.
- e. CDC. Risk for COVID-19 Infection, Hospitalization, and Death By Race/Ethnicity. Website: <https://www.cdc.gov/coronavirus/2019-ncov/covid-data/investigations-discovery/hospitalization-death-by-race-ethnicity.html>. Updated 3/10/22. Accessed 3/24/22.
- f. Duca LM, Coyle J, McCabe C, et al. COVID-19 Stats: COVID-19 incidence, by urban-rural classification — United States, January 22–October 31, 2020. *Morb. Mortal. Wkly. Rep.* 69, 2020 (2020).

- g. Ferguson JM, Justice AC, Osborne TF, et al. Geographic and temporal variation in racial and ethnic disparities in SARS-CoV-2 positivity between February 2020 and August 2021 in the United States. *Sci Rep* 12, 273 (2022). <https://doi.org/10.1038/s41598-021-03967-5>
- h. ATSDR. Innovative Uses of SVI During COVID-19. Website: [https://www.atsdr.cdc.gov/placeandhealth/project\\_snapshots/svitool\\_covid.html?msckid=ccb486b1aebc11ecac9c44d283148e13#anchor\\_1630441079427](https://www.atsdr.cdc.gov/placeandhealth/project_snapshots/svitool_covid.html?msckid=ccb486b1aebc11ecac9c44d283148e13#anchor_1630441079427). Updated: 8/31/21. Accessed 4/6/22.
- i. Barry V, Dasgupta S, Weller DL, et al. Patterns in COVID-19 Vaccination Coverage, by Social Vulnerability and Urbanicity - United States, December 14, 2020-May 1, 2021. *MMWR Morb Mortal Wkly Rep.* 2021 Jun 4;70(22):818-824. doi: 10.15585/mmwr.mm7022e1.
- j. Thakore N, Khazanchi R, Orav EJ, and Ganguli I. Association of Social Vulnerability, COVID-19 vaccine site density, and vaccination rates in the United States. *Healthc (Amst).* 2021 Dec; 9(4):100583. doi: 10.1016/j.hjdsi.2021.100583.
- k. Neelon B, Mutiso F, Mueller NT, et al. Spatial and temporal trends in social vulnerability and COVID-19 incidence and death rates in the United States. *PLoS One.* 2021 Mar 24;16(3):e0248702. doi: 10.1371/journal.pone.0248702.
- l. U.S. Census Bureau, Population Division. Annual Estimates of the Resident Population by Sex, Age, Race, and Hispanic Origin for the United States: April 1, 2010 to July 1, 2019 (NC-EST2019-ASR6H). Website: <https://www.census.gov/data/tables/time-series/demo/popest/2010s-national-detail.html>. Accessed 4/6/2022.
- m. Percentages of the U.S. population by race based on 2019 estimates of population 18 and older reporting a single race. Those reporting 2 or more races were not included as ICATT does not allow reporting of more than 1 race category.

**Figure S2.** Vaccine effectiveness (VE) against symptomatic Omicron infection for vaccination regimens by mRNA COVID-19 vaccine product among adults aged ≥18 years tested in the *Increasing Community Access to Testing* platform, January 2, 2022 to March 23, 2022.

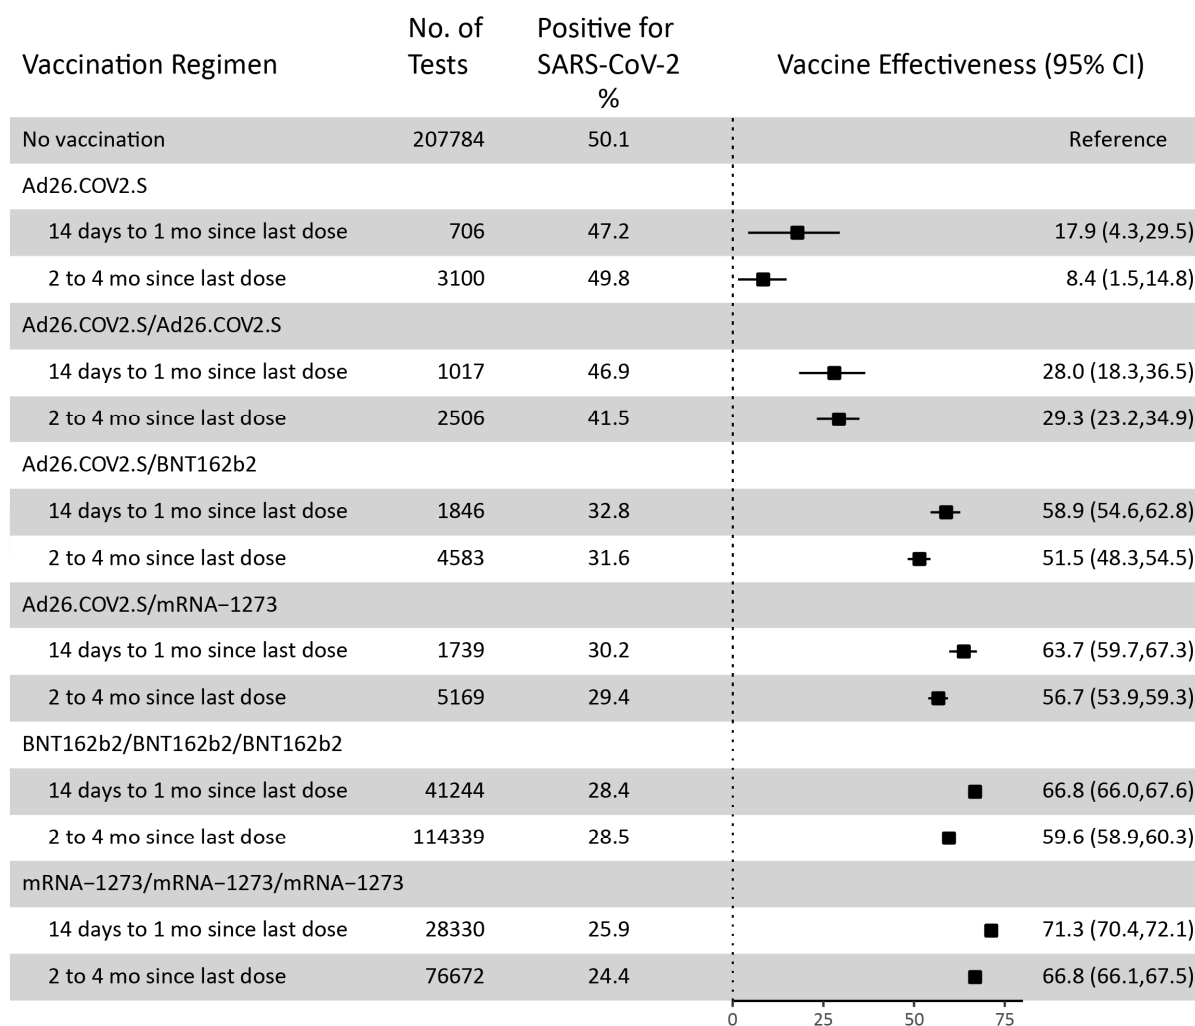

VE was estimated using logistic regression comparing each vaccination regimen against no vaccination, where  $VE = (1 - \text{odds ratio}) \times 100\%$ . Regression models were adjusted for the number of days between the start of the analysis period and test date (as a continuous variable with linear and quadratic terms), age group (18-24, 25-34, 35-44, 45-54, 55-64, ≥65 years), sex, race, ethnicity, testing site HHS region, testing site census tract social vulnerability index (SVI, dichotomized as  $0 < SVI < 0.5$  and  $SVI \geq 0.5$ ), and number of underlying chronic conditions (0, 1, or ≥2) to control for possible confounding (**Table S1**). No

adjustment was made for multiplicity. Months since last dose was calculated as the difference between the month and year of testing and the month and year of the last vaccine dose. Tests from participants with <2 weeks between the date of the last dose and the date of testing were excluded. For all boosted regimens tests were excluded if <2 or <5 months for Ad26.COVID.S and mRNA primary series, respectively, had elapsed between the last dose of the primary series and the booster dose. To estimate VE of Ad26.COVID.S over time we did not limit by months since primary series receipt (i.e., eligibility for boosting).

### **Sensitivity analysis**

To assess the effect of prior SARS-CoV-2 test positivity on our results, we conducted a sensitivity analysis including all tests regardless of whether the individual reported any prior positive test result (**Figure S3**).

With the exception of Ad26.COVS at 14 days to 1 month since last dose, all point estimates for VE were higher in the main analysis compared to the sensitivity analysis, indicative of including tests from individuals reporting prior infection biasing estimates of VE towards less protection. Overall trends remained similar in the sensitivity analysis, supporting our main finding that a single booster dose of mRNA COVID-19 vaccine in Ad26.COVS primary series recipients provides protection close to that of 3 mRNA vaccine doses. These results can also help us understand the additional protection provided by vaccination as prior SARS-CoV-2 infection becomes more common in the U.S. population. A limitation of this sensitivity analysis is that prior infection status is self-reported and individuals might choose not to report prior infection, may not be aware of having been previously infected, or may not accurately recall dates of infection. If there was differential accuracy in the ascertainment or reporting of prior infection between unvaccinated and vaccinated individuals, it is possible that there might still be confounding by prior infection that this sensitivity analysis cannot account for.



**Figure S3.** Sensitivity analysis of vaccine effectiveness (VE) against symptomatic SARS-CoV-2 Omicron infection for four vaccination regimens among adults aged  $\geq 18$  years tested in *the Increasing Community Access to Testing* platform, January 2, 2022 to March 23, 2022 including all tests regardless of self-report of prior SARS-CoV-2 infection.

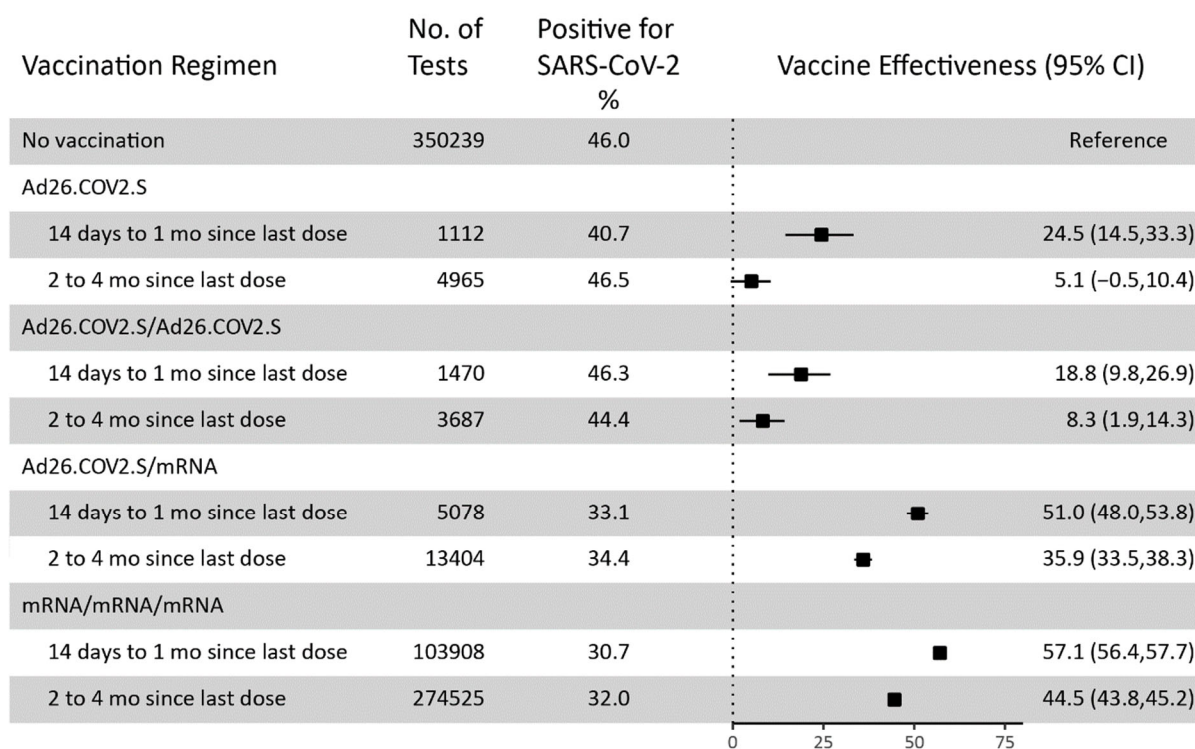

VE was estimated using logistic regression comparing each vaccination regimen against no vaccination, where  $VE = (1 - \text{odds ratio}) \times 100\%$ . Regression models were adjusted for the number of days between the start of the analysis period and test date (as a continuous variable with linear and quadratic terms), age group (18-24, 25-34, 35-44, 45-54, 55-64,  $\geq 65$  years), sex, race, ethnicity, testing site HHS region, testing site census tract social vulnerability index (SVI, dichotomized as  $0 < 0.5$  and  $\geq 0.5-1$ ), and number of underlying chronic conditions (0, 1, or  $\geq 2$ ) to control for possible confounding (**Table S1**). No adjustment was made for multiplicity. Months since last dose was calculated as the difference between the month and year of testing and the month and year of the last vaccine dose. Tests from participants with  $< 2$  weeks between the date of the last dose and the date of testing were excluded. For all boosted

regimens tests were excluded if <2 or <5 months for Ad26.COV2.S and mRNA primary series, respectively, had elapsed between the last dose of the primary series and the booster dose. To estimate VE of Ad26.COV2.S over time we did not limit by months since primary series receipt (i.e., eligibility for boosting).

**Table S3.** Logistic regression model coefficients for main analysis (**Figure 1** model), 14 days to 1 month since last vaccine dose

|                                               | Estimate | Std. Error | z value  | Pr(> z ) |
|-----------------------------------------------|----------|------------|----------|----------|
| (Intercept)                                   | -0.26122 | 0.03942    | -6.62658 | 3.44E-11 |
| vaccination_statusjanssen                     | -0.19657 | 0.078051   | -2.51851 | 0.011785 |
| vaccination_statusjanssen_janssen             | -0.32774 | 0.064334   | -5.09442 | 3.5E-07  |
| vaccination_statusjanssen_mrna                | -0.94842 | 0.036928   | -25.6829 | 1.8E-145 |
| vaccination_statusmrna_mrna                   | -1.16761 | 0.010005   | -116.707 | 0        |
| age_group25-34                                | 0.119161 | 0.011665   | 10.21532 | 1.69E-24 |
| age_group35-44                                | 0.173422 | 0.012821   | 13.52648 | 1.09E-41 |
| age_group45-54                                | 0.236935 | 0.014466   | 16.37844 | 2.73E-60 |
| age_group55-64                                | 0.265808 | 0.01608    | 16.53055 | 2.21E-61 |
| age_group65+                                  | 0.243857 | 0.019842   | 12.29027 | 1.02E-34 |
| genderMale                                    | 0.273183 | 0.007985   | 34.21348 | 1.5E-256 |
| raceAsian                                     | 0.026205 | 0.041799   | 0.626914 | 0.530716 |
| raceBlack or African American                 | -0.26395 | 0.038007   | -6.9447  | 3.79E-12 |
| raceMissing                                   | 0.018392 | 0.038983   | 0.471812 | 0.637061 |
| raceNative Hawaiian or Other Pacific Islander | -0.15577 | 0.060102   | -2.59181 | 0.009547 |
| raceWhite                                     | 0.020407 | 0.036865   | 0.553557 | 0.579882 |
| ethnicityMissing                              | -0.03687 | 0.017268   | -2.13497 | 0.032764 |
| ethnicityNot Hispanic/Latino                  | -0.05567 | 0.012072   | -4.61189 | 3.99E-06 |
| SVI_binbelow_0.5                              | -0.01169 | 0.008191   | -1.42779 | 0.153352 |
| regionEast South Central                      | 0.26203  | 0.015081   | 17.37455 | 1.29E-67 |
| regionMid-Atlantic                            | 0.006904 | 0.020061   | 0.344138 | 0.730742 |
| regionMountain                                | 0.14238  | 0.016223   | 8.776559 | 1.69E-18 |
| regionNew England                             | 0.042421 | 0.026665   | 1.590899 | 0.111632 |
| regionPacific                                 | 0.172101 | 0.018878   | 9.116242 | 7.78E-20 |
| regionPuerto Rico                             | -0.79663 | 0.068969   | -11.5506 | 7.33E-31 |
| regionSouth Atlantic                          | 0.236912 | 0.012378   | 19.13933 | 1.19E-81 |
| regionWest North Central                      | 0.043529 | 0.016775   | 2.594904 | 0.009462 |
| regionWest South Central                      | 0.102348 | 0.013724   | 7.457493 | 8.82E-14 |
| risk_conditions_catone                        | -0.09002 | 0.010245   | -8.78707 | 1.54E-18 |
| risk_conditions_cattwo+                       | -0.16891 | 0.012744   | -13.2541 | 4.27E-40 |
| poly(days_since_start, 2)1                    | -284.659 | 2.738702   | -103.94  | 0        |
| poly(days_since_start, 2)2                    | -172.776 | 2.792373   | -61.8744 | 0        |

**Table S4.** Logistic regression model coefficients for main analysis (**Figure 1** model), 2 to 4 months since last vaccine dose

|                                               | Estimate | Std. Error | z value  | Pr(> z ) |
|-----------------------------------------------|----------|------------|----------|----------|
| (Intercept)                                   | -0.34063 | 0.035767   | -9.52349 | 1.67E-21 |
| vaccination_statusjanssen                     | -0.08755 | 0.037145   | -2.3569  | 0.018428 |
| vaccination_statusjanssen_janssen             | -0.34566 | 0.042198   | -8.19132 | 2.58E-16 |
| vaccination_statusjanssen_mrna                | -0.78281 | 0.02323    | -33.6978 | 6.2E-249 |
| vaccination_statusmrna_mrna                   | -0.98864 | 0.007903   | -125.103 | 0        |
| age_group25-34                                | 0.104423 | 0.011148   | 9.367137 | 7.45E-21 |
| age_group35-44                                | 0.17533  | 0.011968   | 14.65043 | 1.34E-48 |
| age_group45-54                                | 0.240165 | 0.013133   | 18.28772 | 1.04E-74 |
| age_group55-64                                | 0.281819 | 0.013753   | 20.49132 | 2.57E-93 |
| age_group65+                                  | 0.284365 | 0.014205   | 20.01906 | 3.76E-89 |
| genderMale                                    | 0.305416 | 0.00672    | 45.44705 | 0        |
| raceAsian                                     | 0.051664 | 0.036868   | 1.401338 | 0.161113 |
| raceBlack or African American                 | -0.22722 | 0.034636   | -6.56009 | 5.38E-11 |
| raceMissing                                   | -0.00439 | 0.035399   | -0.12407 | 0.901257 |
| raceNative Hawaiian or Other Pacific Islander | -0.13166 | 0.05508    | -2.39032 | 0.016834 |
| raceWhite                                     | 0.01236  | 0.03353    | 0.368624 | 0.712408 |
| ethnicityMissing                              | -0.05318 | 0.015103   | -3.52137 | 0.000429 |
| ethnicityNot Hispanic/Latino                  | -0.07522 | 0.010646   | -7.06546 | 1.6E-12  |
| SVI_binbelow_0.5                              | -0.023   | 0.00685    | -3.35779 | 0.000786 |
| regionEast South Central                      | 0.261289 | 0.013024   | 20.06139 | 1.61E-89 |
| regionMid-Atlantic                            | 0.020908 | 0.016288   | 1.283636 | 0.199269 |
| regionMountain                                | 0.171568 | 0.013207   | 12.99081 | 1.38E-38 |
| regionNew England                             | -0.00188 | 0.02145    | -0.08778 | 0.93005  |
| regionPacific                                 | 0.161639 | 0.015633   | 10.33943 | 4.67E-25 |
| regionPuerto Rico                             | -0.56076 | 0.056107   | -9.99448 | 1.61E-23 |
| regionSouth Atlantic                          | 0.226711 | 0.01031    | 21.98859 | 3.7E-107 |
| regionWest North Central                      | 0.040101 | 0.013884   | 2.888407 | 0.003872 |
| regionWest South Central                      | 0.125012 | 0.011755   | 10.63483 | 2.05E-26 |
| risk_conditions_catone                        | -0.1094  | 0.008457   | -12.9351 | 2.85E-38 |
| risk_conditions_cattwo+                       | -0.16929 | 0.009824   | -17.2328 | 1.51E-66 |
| poly(days_since_start, 2)1                    | -312.112 | 2.723247   | -114.61  | 0        |
| poly(days_since_start, 2)2                    | -162.687 | 2.670003   | -60.9315 | 0        |

**Table S5.** Logistic regression model coefficients for sub-analysis by mRNA COVID-19 vaccine product (Figure S2 model), 14 days to 1 month since last vaccine dose

|                                               | Estimate | Std. Error | z value  | Pr(> z ) |
|-----------------------------------------------|----------|------------|----------|----------|
| (Intercept)                                   | -0.26295 | 0.039426   | -6.66952 | 2.57E-11 |
| vaccination_status_janssen                    | -0.19671 | 0.078052   | -2.52019 | 0.011729 |
| vaccination_status_janssen_janssen            | -0.32877 | 0.064334   | -5.11026 | 3.22E-07 |
| vaccination_status_janssen_pfizer             | -0.88814 | 0.050726   | -17.5086 | 1.23E-68 |
| vaccination_status_janssen_moderna            | -1.0138  | 0.053271   | -19.0309 | 9.46E-81 |
| vaccination_status_pfizer_pfizer              | -1.10328 | 0.012499   | -88.2694 | 0        |
| vaccination_status_moderna_moderna            | -1.24815 | 0.014932   | -83.586  | 0        |
| vaccination_status_other*                     | -1.22078 | 0.025886   | -47.1602 | 0        |
| age_group25-34                                | 0.120318 | 0.011664   | 10.3151  | 6.02E-25 |
| age_group35-44                                | 0.174456 | 0.01282    | 13.60759 | 3.61E-42 |
| age_group45-54                                | 0.237965 | 0.014467   | 16.4492  | 8.5E-61  |
| age_group55-64                                | 0.267604 | 0.016086   | 16.63582 | 3.83E-62 |
| age_group65+                                  | 0.24988  | 0.019872   | 12.57429 | 2.92E-36 |
| genderMale                                    | 0.273088 | 0.007986   | 34.19714 | 2.7E-256 |
| raceAsian                                     | 0.019927 | 0.041811   | 0.476605 | 0.633643 |
| raceBlack or African American                 | -0.26519 | 0.038012   | -6.97638 | 3.03E-12 |
| raceMissing                                   | 0.018048 | 0.038987   | 0.462929 | 0.643415 |
| raceNative Hawaiian or Other Pacific Islander | -0.15587 | 0.060108   | -2.59308 | 0.009512 |
| raceWhite                                     | 0.020396 | 0.036871   | 0.553174 | 0.580144 |
| ethnicityMissing                              | -0.03551 | 0.017271   | -2.05582 | 0.0398   |
| ethnicityNot Hispanic/Latino                  | -0.05381 | 0.012075   | -4.45658 | 8.33E-06 |
| SVI_binbelow_0.5                              | -0.01284 | 0.008193   | -1.56714 | 0.117082 |
| regionEast South Central                      | 0.260879 | 0.015082   | 17.29708 | 4.95E-67 |
| regionMid-Atlantic                            | 0.005304 | 0.020063   | 0.264384 | 0.791484 |
| regionMountain                                | 0.14276  | 0.016227   | 8.797894 | 1.39E-18 |
| regionNew England                             | 0.046568 | 0.02669    | 1.744794 | 0.081021 |
| regionPacific                                 | 0.172905 | 0.018883   | 9.15652  | 5.36E-20 |
| regionPuerto Rico                             | -0.79435 | 0.068988   | -11.5142 | 1.12E-30 |
| regionSouth Atlantic                          | 0.235925 | 0.01238    | 19.05684 | 5.77E-81 |
| regionWest North Central                      | 0.042545 | 0.016777   | 2.535953 | 0.011214 |
| regionWest South Central                      | 0.103054 | 0.013727   | 7.507214 | 6.04E-14 |
| risk_conditions_catone                        | -0.08972 | 0.010247   | -8.75575 | 2.03E-18 |
| risk_conditions_cattwo+                       | -0.16763 | 0.01275    | -13.1478 | 1.75E-39 |
| poly(days_since_start, 2)1                    | -284.779 | 2.738732   | -103.982 | 0        |
| poly(days_since_start, 2)2                    | -172.748 | 2.792617   | -61.8587 | 0        |

\* The “other” category of vaccination status included mixed BNT162b2 and mRNA-1273 regimens that were originally included in the 3 mRNA doses group.

**Table S6.** Logistic regression model coefficients for sub-analysis by mRNA COVID-19 vaccine product (Figure S2 model), 2 to 4 months since last vaccine dose

|                                               | Estimate | Std. Error | z value  | Pr(> z ) |
|-----------------------------------------------|----------|------------|----------|----------|
| (Intercept)                                   | -0.33976 | 0.035782   | -9.49518 | 2.2E-21  |
| vaccination_status_twojanssen                 | -0.08785 | 0.037142   | -2.36536 | 0.018013 |
| vaccination_status_twojanssen_janssen         | -0.34669 | 0.042193   | -8.21683 | 2.09E-16 |
| vaccination_status_twojanssen_pfizer          | -0.72352 | 0.033045   | -21.8951 | 2.9E-106 |
| vaccination_status_twojanssen_moderna         | -0.83728 | 0.031775   | -26.3501 | 5.1E-153 |
| vaccination_status_twopfizer_pfizer           | -0.90676 | 0.008998   | -100.776 | 0        |
| vaccination_status_twomoderna_moderna         | -1.10366 | 0.01063    | -103.828 | 0        |
| vaccination_status_twoother                   | -1.08128 | 0.020254   | -53.3849 | 0        |
| age_group25-34                                | 0.105301 | 0.011146   | 9.447039 | 3.49E-21 |
| age_group35-44                                | 0.176762 | 0.011967   | 14.77025 | 2.28E-49 |
| age_group45-54                                | 0.241249 | 0.013134   | 18.36866 | 2.34E-75 |
| age_group55-64                                | 0.283746 | 0.013759   | 20.62238 | 1.73E-94 |
| age_group65+                                  | 0.291    | 0.014243   | 20.43125 | 8.82E-93 |
| genderMale                                    | 0.30535  | 0.006723   | 45.41876 | 0        |
| raceAsian                                     | 0.042768 | 0.036887   | 1.159434 | 0.246279 |
| raceBlack or African American                 | -0.23192 | 0.034651   | -6.6929  | 2.19E-11 |
| raceMissing                                   | -0.00686 | 0.035415   | -0.19363 | 0.846464 |
| raceNative Hawaiian or Other Pacific Islander | -0.1357  | 0.055083   | -2.46361 | 0.013754 |
| raceWhite                                     | 0.010734 | 0.033546   | 0.319973 | 0.748989 |
| ethnicityMissing                              | -0.05085 | 0.015107   | -3.36622 | 0.000762 |
| ethnicityNot Hispanic/Latino                  | -0.07257 | 0.010649   | -6.81483 | 9.44E-12 |
| SVI_binbelow_0.5                              | -0.02538 | 0.006855   | -3.70317 | 0.000213 |
| regionEast South Central                      | 0.259296 | 0.013027   | 19.90481 | 3.7E-88  |
| regionMid-Atlantic                            | 0.017932 | 0.016294   | 1.100519 | 0.271106 |
| regionMountain                                | 0.170481 | 0.013213   | 12.90217 | 4.38E-38 |
| regionNew England                             | 0.003012 | 0.021475   | 0.140255 | 0.888458 |
| regionPacific                                 | 0.161744 | 0.015642   | 10.34024 | 4.63E-25 |
| regionPuerto Rico                             | -0.56091 | 0.056114   | -9.9958  | 1.59E-23 |
| regionSouth Atlantic                          | 0.226982 | 0.010315   | 22.00569 | 2.5E-107 |
| regionWest North Central                      | 0.037449 | 0.013889   | 2.696268 | 0.007012 |
| regionWest South Central                      | 0.126416 | 0.011761   | 10.74887 | 6E-27    |
| risk_conditions_catone                        | -0.10954 | 0.008462   | -12.945  | 2.51E-38 |
| risk_conditions_cattwo+                       | -0.16998 | 0.009831   | -17.2914 | 5.46E-67 |
| poly(days_since_start, 2)1                    | -310.804 | 2.724578   | -114.074 | 0        |
| poly(days_since_start, 2)2                    | -162.501 | 2.670261   | -60.8557 | 0        |

**Table S7.** Logistic regression model coefficients for sensitivity analysis (**Figure S3** model), 14 days to 1 month since last vaccine dose

|                                               | Estimate | Std. Error | z value  | Pr(> z ) |
|-----------------------------------------------|----------|------------|----------|----------|
| (Intercept)                                   | -0.51907 | 0.030756   | -16.877  | 6.64E-64 |
| vaccination_statusjanssen                     | -0.28039 | 0.063283   | -4.43074 | 9.39E-06 |
| vaccination_statusjanssen_janssen             | -0.20851 | 0.053531   | -3.89506 | 9.82E-05 |
| vaccination_statusjanssen_mrna                | -0.71321 | 0.030636   | -23.28   | 7.1E-120 |
| vaccination_statusmrna_mrna                   | -0.84548 | 0.008176   | -103.415 | 0        |
| age_group25-34                                | 0.098826 | 0.009112   | 10.84567 | 2.09E-27 |
| age_group35-44                                | 0.145324 | 0.010038   | 14.47723 | 1.69E-47 |
| age_group45-54                                | 0.221266 | 0.011306   | 19.57147 | 2.71E-85 |
| age_group55-64                                | 0.276505 | 0.012631   | 21.89035 | 3.2E-106 |
| age_group65+                                  | 0.28821  | 0.015853   | 18.17995 | 7.44E-74 |
| genderMale                                    | 0.297428 | 0.006286   | 47.3134  | 0        |
| raceAsian                                     | 0.049848 | 0.033044   | 1.50855  | 0.131414 |
| raceBlack or African American                 | -0.25016 | 0.029666   | -8.4325  | 3.38E-17 |
| raceMissing                                   | 0.052096 | 0.030464   | 1.710063 | 0.087254 |
| raceNative Hawaiian or Other Pacific Islander | -0.09295 | 0.04781    | -1.94404 | 0.051891 |
| raceWhite                                     | 0.058648 | 0.028757   | 2.039418 | 0.041408 |
| ethnicityMissing                              | -0.00507 | 0.01373    | -0.36939 | 0.711835 |
| ethnicityNot Hispanic/Latino                  | -0.01279 | 0.009255   | -1.38215 | 0.166927 |
| SVI_binbelow_0.5                              | -0.01328 | 0.006437   | -2.06252 | 0.039158 |
| regionEast South Central                      | 0.274037 | 0.011873   | 23.08042 | 7.3E-118 |
| regionMid-Atlantic                            | -0.00952 | 0.01633    | -0.58304 | 0.55987  |
| regionMountain                                | 0.11263  | 0.012936   | 8.706431 | 3.14E-18 |
| regionNew England                             | 0.101365 | 0.022405   | 4.524156 | 6.06E-06 |
| regionPacific                                 | 0.246605 | 0.015526   | 15.88284 | 8.33E-57 |
| regionPuerto Rico                             | -0.50801 | 0.055762   | -9.11026 | 8.22E-20 |
| regionSouth Atlantic                          | 0.266122 | 0.009697   | 27.44321 | 8.4E-166 |
| regionWest North Central                      | 0.025654 | 0.013532   | 1.895872 | 0.057977 |
| regionWest South Central                      | 0.118392 | 0.010623   | 11.1445  | 7.62E-29 |
| risk_conditions_catone                        | -0.08734 | 0.008099   | -10.7847 | 4.06E-27 |
| risk_conditions_cattwo+                       | -0.15149 | 0.010099   | -15.0003 | 7.31E-51 |
| poly(days_since_start, 2)1                    | -356.236 | 2.744519   | -129.799 | 0        |
| poly(days_since_start, 2)2                    | -219.163 | 2.760733   | -79.3856 | 0        |



**Table S8.** Logistic regression model coefficients for sensitivity analysis (**Figure S3** model), 2 to 4 months since last vaccine dose

|                                               | Estimate | Std. Error | z value  | Pr(> z ) |
|-----------------------------------------------|----------|------------|----------|----------|
| (Intercept)                                   | -0.57004 | 0.028068   | -20.3094 | 1.06E-91 |
| vaccination_statusjanssen                     | -0.05248 | 0.029404   | -1.78491 | 0.074276 |
| vaccination_statusjanssen_janssen             | -0.08628 | 0.03446    | -2.50389 | 0.012284 |
| vaccination_statusjanssen_mrna                | -0.44542 | 0.019159   | -23.2483 | 1.5E-119 |
| vaccination_statusmrna_mrna                   | -0.58948 | 0.006312   | -93.3864 | 0        |
| age_group25-34                                | 0.081412 | 0.008701   | 9.356261 | 8.26E-21 |
| age_group35-44                                | 0.138956 | 0.00938    | 14.81481 | 1.18E-49 |
| age_group45-54                                | 0.22002  | 0.010288   | 21.38505 | 1.8E-101 |
| age_group55-64                                | 0.289212 | 0.01083    | 26.70347 | 4.3E-157 |
| age_group65+                                  | 0.314594 | 0.011337   | 27.75014 | 1.7E-169 |
| genderMale                                    | 0.324279 | 0.00534    | 60.72981 | 0        |
| raceAsian                                     | 0.074312 | 0.029143   | 2.549923 | 0.010775 |
| raceBlack or African American                 | -0.21133 | 0.027186   | -7.77355 | 7.63E-15 |
| raceMissing                                   | 0.045781 | 0.027834   | 1.644821 | 0.100007 |
| raceNative Hawaiian or Other Pacific Islander | -0.06405 | 0.043872   | -1.4599  | 0.144318 |
| raceWhite                                     | 0.052083 | 0.026321   | 1.978759 | 0.047843 |
| ethnicityMissing                              | -0.02958 | 0.012069   | -2.45089 | 0.01425  |
| ethnicityNot Hispanic/Latino                  | -0.03228 | 0.008194   | -3.93911 | 8.18E-05 |
| SVI_binbelow_0.5                              | -0.01796 | 0.005443   | -3.30011 | 0.000966 |
| regionEast South Central                      | 0.274845 | 0.010356   | 26.54045 | 3.3E-155 |
| regionMid-Atlantic                            | -0.01605 | 0.013421   | -1.1955  | 0.231893 |
| regionMountain                                | 0.133638 | 0.010663   | 12.53303 | 4.92E-36 |
| regionNew England                             | 0.007679 | 0.01821    | 0.421693 | 0.673249 |
| regionPacific                                 | 0.211083 | 0.012919   | 16.33837 | 5.26E-60 |
| regionPuerto Rico                             | -0.28904 | 0.04473    | -6.46186 | 1.03E-10 |
| regionSouth Atlantic                          | 0.265304 | 0.00817    | 32.47426 | 2.5E-231 |
| regionWest North Central                      | 0.018977 | 0.011324   | 1.675821 | 0.093773 |
| regionWest South Central                      | 0.158441 | 0.009149   | 17.31769 | 3.46E-67 |
| risk_conditions_catone                        | -0.09989 | 0.006751   | -14.7964 | 1.55E-49 |
| risk_conditions_cattwo+                       | -0.17501 | 0.007903   | -22.1461 | 1.1E-108 |
| poly(days_since_start, 2)1                    | -355.822 | 2.582462   | -137.784 | 0        |
| poly(days_since_start, 2)2                    | -209.348 | 2.556232   | -81.8972 | 0        |

## References

1. Britton A, Fleming-Dutra KE, Shang N, et al. Association of COVID-19 Vaccination with Symptomatic SARS-CoV-2 Infection by Time Since Vaccination and Delta Variant Predominance. *JAMA*. 2022;327(11):1032-1041. doi:10.1001/jama.2022.2068
2. Accorsi EK, Britton A, Fleming-Dutra KE, et al. Association Between 3 Doses of mRNA COVID-19 Vaccine and Symptomatic Infection Caused by the SARS-CoV-2 Omicron and Delta Variants. *JAMA*. 2022;327(7):639-651. doi:10.1001/jama.2022.0470
3. Fleming-Dutra KE, Britton A, Shang N, et al. Association of Prior BNT162b2 COVID-19 Vaccination with Symptomatic SARS-CoV-2 Infection in Children and Adolescents During Omicron Predominance. *JAMA*. Published online May 13, 2022. doi:10.1001/jama.2022.7493
4. CDC. Increasing Community Access to Testing (ICATT) for COVID-19. Accessed February 26, 2022. <https://www.cdc.gov/icatt/index.html>
5. CDC. 07/31/2020 Lab Advisory: Update on COVID-19 Laboratory Reporting Requirements. <https://www.cdc.gov/csels/dls/locs/2020/update-on-covid-19-reporting-requirements.html>
6. ATSDR. CDC/ATSDR Social Vulnerability Index. <https://www.atsdr.cdc.gov/placeandhealth/svi/index.html>
7. Chua H, Feng S, Lewnard JA, et al. The Use of Test-negative Controls to Monitor Vaccine Effectiveness: A Systematic Review of Methodology. *Epidemiology*. 2020;31(1):43-64. doi:10.1097/EDE.0000000000001116
8. CDC. Interim Clinical Considerations for Use of COVID-19 Vaccines Currently Approved or Authorized in the United States. Accessed April 7, 2022. <https://www.cdc.gov/vaccines/covid-19/clinical-considerations/covid-19-vaccines-us.html>
